# Supplementary material for: NOTCH3 as a prognostic biomarker and its correlation with immune infiltration in gastrointestinal cancers
Source: Springer Nature journal article supplement (doi:10.1038/s41598-024-65036-x), 2024-06-21

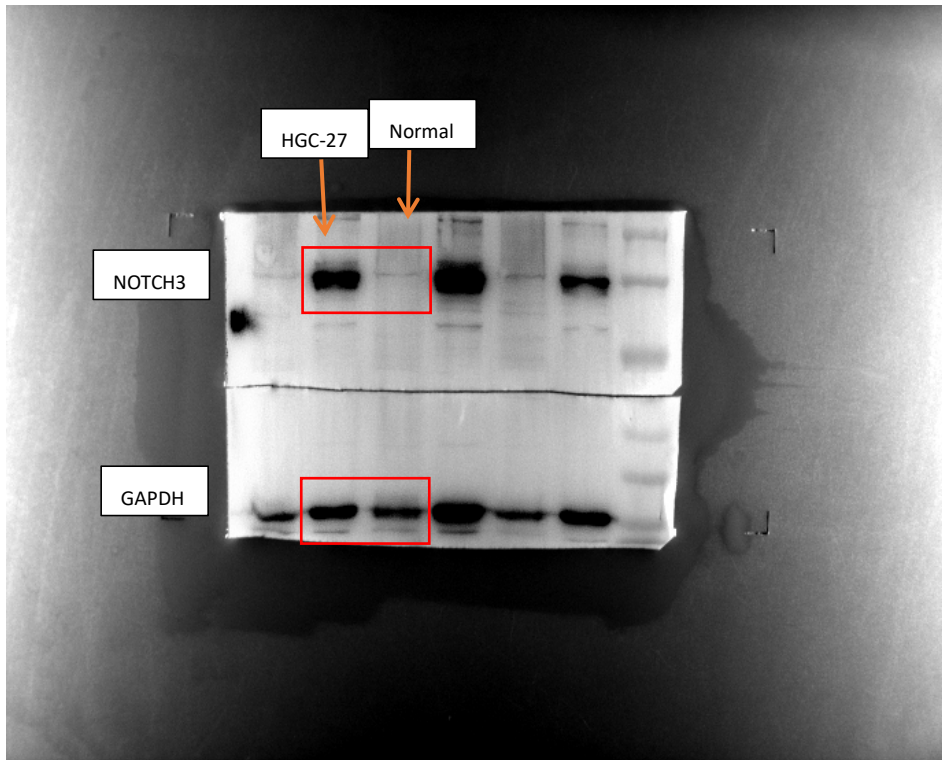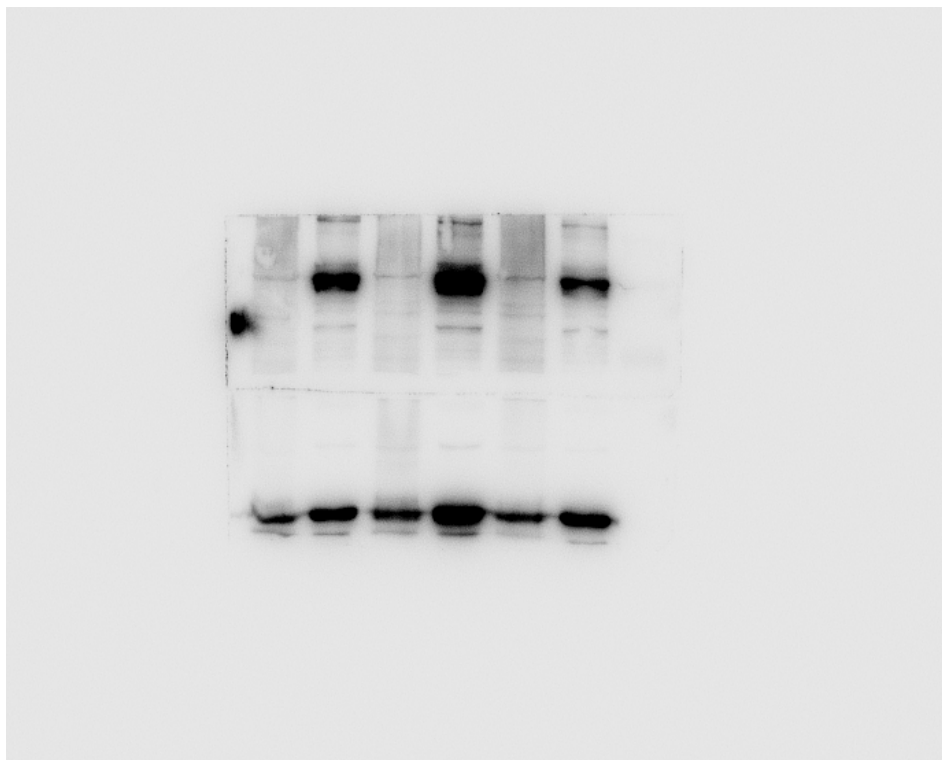

Supplement: MOESM1 [file 41598_2024_65036_MOESM1_ESM-1.pdf]
